# Supplementary material for: Silica-coated magnetic nanoparticles activate microglia and induce neurotoxic d-serine secretion
Source: PubMed Central journal article supplement (PMC8359100; doi:10.1186/s12989-021-00420-3), 2021-08-12

**a**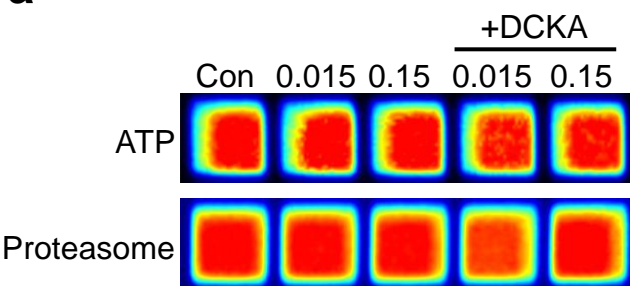**b**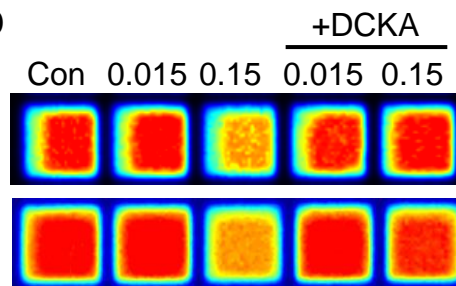**c**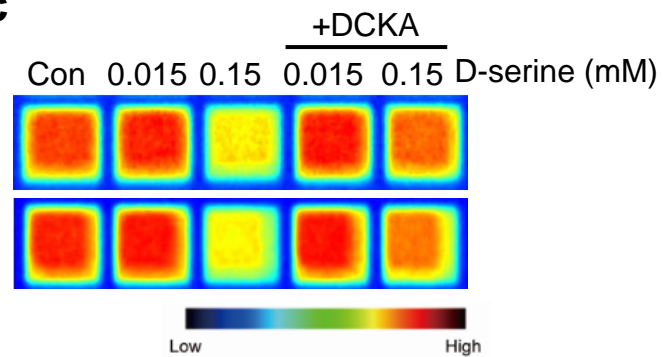**d**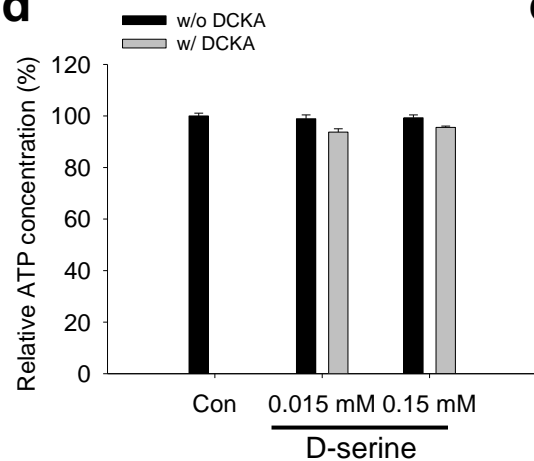**e**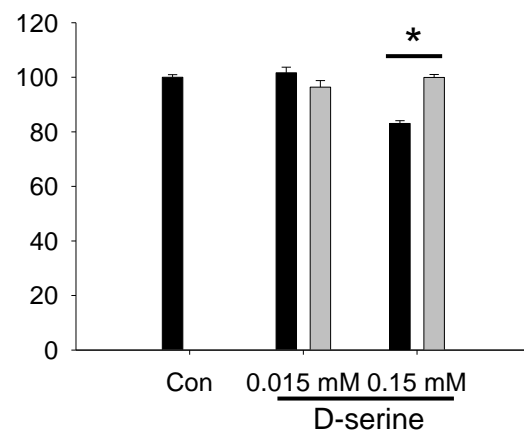**f**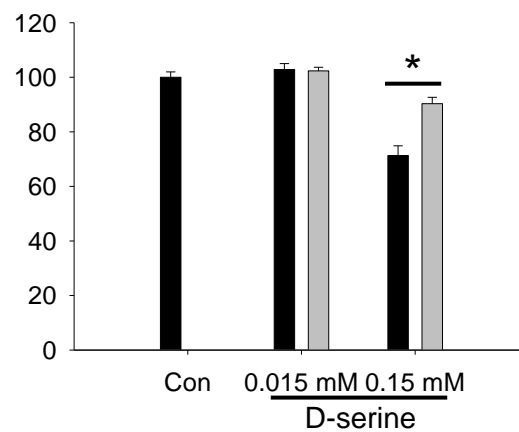**g**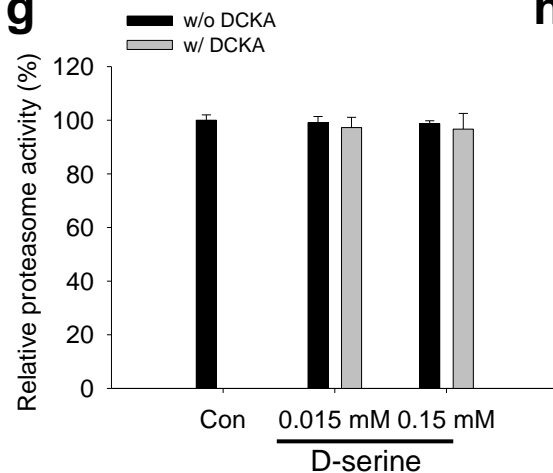**h**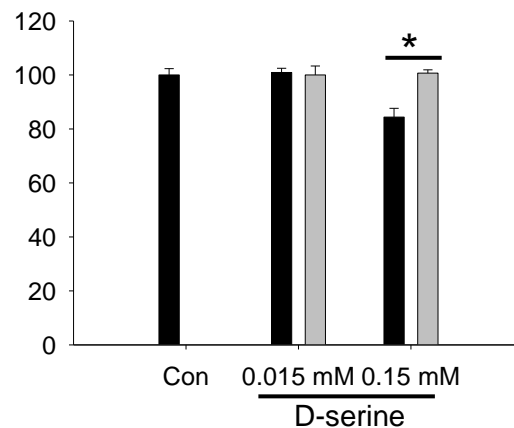**i**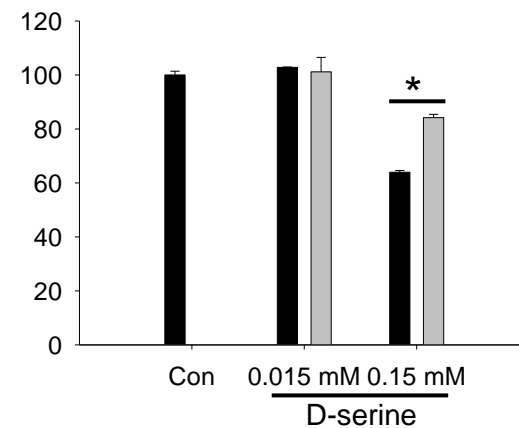

Supplement: 12989_2021_420_MOESM17_ESM.pdf [file 12989_2021_420_MOESM17_ESM.pdf]
